# Supplementary figures and images for: Effect of Lactiplantibacillus plantarum HM-22 on immunoregulation and intestinal microbiota in α-lactalbumin-induced allergic mice
Source: Royal Society of Chemistry journal article supplement (doi:10.1039/d1fo01703a), 2021-01-01

**supplemental data**

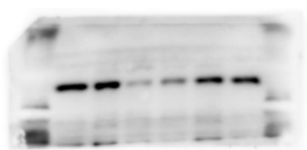

Claudin-1

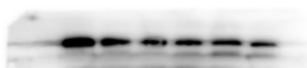

Occludin

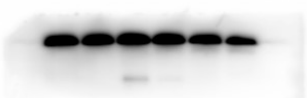

β -actin

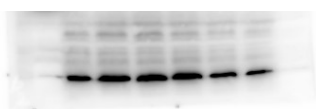

p65

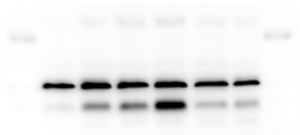

IκBα

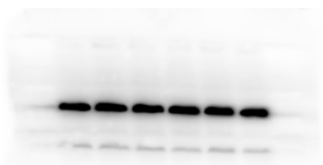

β -actin

Supplement: d1fo01703a1.pdf [file d1fo01703a1.pdf]
